# Supplementary material for: Understanding the Buffering Effects of Protective Factors on the Relationship between Adverse Childhood Experiences and Teen Dating Violence Perpetration
Source: Springer Nature journal article supplement (doi:10.1007/s10964-019-01028-9), 2019-04-30
Supplement: MOESM1 [file 16689354]

| No. classes | -2 LL | AIC | BIC | aBIC | Entropy | VLRT | p | LMRT | p | BLRT | p |
| --- | --- | --- | --- | --- | --- | --- | --- | --- | --- | --- | --- |
| **Family Conflict** |  |  |  |  |  |  |  |  |  |  |  |
| 1 class | 25471.33 | 25489.33 | 25537.79 | 25509.20 |  |  |  |  |  |  |  |
| 2 class | 25222.86 | 25246.85 | 25311.47 | 25273.34 | 0.77 | 248.48 | 0.00 | 237.74 | 0.00 | 248.48 | 0.00 |
| **3 class** | **25155.42** | **25185.42** | **25266.19** | **25218.54** | **0.72** | **67.43** | **0.00** | **64.51** | **0.00** | **67.43** | **0.00** |
| 4 class | 25042.50 | 25078.50 | 25175.42 | 25118.24 | 0.76 | 112.92 | 0.00 | 108.05 | 0.00 | 112.92 | 0.00 |
| 5 class | 25016.32 | 25058.32 | 25171.39 | 25104.68 | 0.75 | 26.17 | 0.12 | 25.04 | 0.13 | 26.17 | 0.00 |
| **Community Violence** |  |  |  |  |  |  |  |  |  |  |  |
| 1 class | 30694.68 | 30712.68 | 30761.14 | 30732.55 |  |  |  |  |  |  |  |
| 2 class | 30337.15 | 30361.15 | 30425.76 | 30387.64 | .81 | 357.53 | 0.00 | 342.09 | 0.00 | 357.53 | 0.00 |
| **3 class** | **30202.45** | **30232.44** | **30313.21** | **30265.56** | **0.80** | **134.70** | **0.00** | **128.88** | **0.01** | **134.70** | **0.00** |
| 4 class | 30016.86 | 30052.86 | 30149.78 | 30092.60 | 0.86 | 185.58 | 0.05 | 177.56 | 0.05 | 185.58 | 0.00 |
| Note: -2LL = negative 2 log likelihood; AIC = Akaike Information Criteria; BIC = Bayesian Information Criteria; aBIC = sample size adjusted Bayesian Information Criteria; VLRT = Vuong-Lo-Mendell-Rubin Likelihood Ratio Test; Lo-Mendell-Rubin test; BLRT = Bootstrapped log-likelihood ratio test. | | | | | | | | | | | |

Supplemental Table 1. Fit statistics for family violence and community violence growth mixture models estimated separately

Supplemental table 2. Transition probabilities from family conflict GMM to teen dating violence LCA

|  | High All  TDV | Physical/Verbal TDV | Low All TDV |
| --- | --- | --- | --- |
| Increasing family conflict | 0.036 | 0.273 | 0.691 |
| Stable low family conflict | 0.108 | 0.133 | 0.759 |
| Early high, decreasing family conflict | 0.109 | 0.140 | 0.751 |

Supplemental table 3. Moderation results for family conflict GMM to teen dating violence LCA

|  | High All TDV  (*n* = 113) | | | Physical/Verbal TDV  (*n* = 335) | | |
| --- | --- | --- | --- | --- | --- | --- |
|  | *AOR* | 95%CI | | *AOR* | 95% CI | |
| *Increasing family conflict* | | | | | | |
| Empathy | 0.73 | [0.43, | 1.22] | 1.05 | [0.96, | 1.15] |
| Social Support | 0.84 | [0.60, | 1.16] | **0.83** | **[0.69,** | **0.98]** |
| Parental Monitoring | 0.94 | [0.83, | 1.07] | 1.01 | [0.93, | 1.08] |
| School Belonging | 0.89 | [0.59, | 1.32] | **0.81** | **[0.69,** | **0.95]** |
| Academic Achievement | 1.24 | [0.81, | 1.89] | 1.08 | [0.88, | 1.33] |
| *Stable low family conflict* | | | | | | |
| Empathy | 0.96 | [0.76, | 1.21] | 0.97 | [0.81, | 1.16] |
| Social Support | 0.72 | [0.44, | 1.21] | **0.82** | **[0.68,** | **0.98]** |
| Parental Monitoring | 0.98 | [0.88, | 1.08] | 1.02 | [0.93, | 1.11] |
| School Belonging | 1.17 | [0.61, | 2.25] | **0.81** | **[0.67** | **0.97]** |
| Academic Achievement | **0.58** | **[0.35,** | **0.99]** | **0.59** | **[0.42** | **0.84]** |
| *Early high, decreasing family conflict* | | | | | | |
| Empathy | 1.09 | [0.86, | 1.37] | - | - |  |
| Social Support | 0.72 | [0.51, | 1.02] | - | - |  |
| Parental Monitoring | **0.84** | **[0.73,** | **0.97]** | - | - |  |
| School Belonging | 0.90 | [0.53, | 1.52] | - | - |  |
| Academic Achievement | 1.08 | [0.65, | 1.80] | - | - |  |

Supplemental table 4. Transition probabilities from community violence GMM to teen dating violence LCA

|  | High All  TDV | Physical/Verbal TDV | Low All TDV |
| --- | --- | --- | --- |
| Stable high community violence | 0.196 | 0.240 | 0.564 |
| Stable low community violence | 0.061 | 0.263 | 0.677 |
| Moderate, decreasing community violence | 0.062 | 0.178 | 0.760 |

Supplemental Table 5. Moderation results for community violence GMM to teen dating violence LCA

|  | High All TDV  (*n* = 113) | | | Physical/Verbal TDV  (*n* = 335) | | |
| --- | --- | --- | --- | --- | --- | --- |
|  | *AOR* | 95%CI | | *AOR* | 95% CI | |
| *Stable high community violence* | | | | | | |
| Empathy | **0.76** | **[0.59,** | **0.98]** | 1.04 | [0.91, | 1.17] |
| Social Support | **0.72** | **[0.56,** | **0.93]** | **0.76** | **[0.61,** | **0.94]** |
| Parental Monitoring | **0.89** | **[0.80,** | **0.98]** | 0.93 | [0.86, | 1.02] |
| School Belonging | 1.32 | [0.86, | 2.01] | 0.83 | [0.66, | 1.05] |
| Academic Achievement | 1.00 | [0.68, | 1.48] | 1.10 | [0.82, | 1.46] |
| *Stable low community violence* | | | | | | |
| Empathy | 1.04 | [0.84, | 1.29] | 1.04 | [0.93, | 1.17] |
| Social Support | **0.67** | **[0.51,** | **0.90]** | **0.82** | **[0.70,** | **0.95]** |
| Parental Monitoring | 0.90 | [0.74, | 1.03] | 0.95 | [0.87, | 1.03] |
| School Belonging | 1.18 | [0.28, | 1.86] | **0.84** | **[0.72** | **0.98]** |
| Academic Achievement | **0.52** | **[0.93,** | **0.96]** | 1.15 | [0.94 | 1.40] |
| *Moderate, decreasing community violence* | | | | | | |
| Empathy | 0.90 | [0.70, | 1.16] | 1.05 | [0.93, | 1.20] |
| Social Support | 0.84 | [0.69, | 1.03] | 0.99 | [0.82, | 1.20] |
| Parental Monitoring | 0.99 | [0.89, | 1.11] | 0.99 | [0.90, | 1.08] |
| School Belonging | 0.86 | [0.58, | 1.29] | **0.73** | **[0.57,** | **0.93]** |
| Academic Achievement | 1.34 | [0.93, | 1.94] | 1.00 | [0.67, | 1.48] |

Supplemental Figure 1. Class probability plot for family conflict

Supplemental Figure 2. Class probability plot for community violence
